# Supplementary material for: Heme interaction of the intrinsically disordered N-terminal peptide segment of human cystathionine-β-synthase
Source: PubMed Central journal article supplement (PMC5802807; doi:10.1038/s41598-018-20841-z), 2018-02-06
Supplement: 41598_2018_20841_MOESM1_ESM.pdf [file 41598_2018_20841_MOESM1_ESM.pdf]

# Supplementary Information

## Heme interaction of the intrinsically disordered N-terminal peptide segment of human cystathionine- $\beta$ -synthase

**Amit Kumar<sup>1</sup>, Amelie Wißbrock<sup>2</sup>, Nishit Goradia<sup>1</sup>, Peter Bellstedt<sup>3</sup>, Ramadurai Ramachandran<sup>1</sup>, Diana Imhof<sup>2\*</sup> and Oliver Ohlenschläger<sup>1\*</sup>**

<sup>1</sup>Leibniz Institute on Aging – Fritz Lipmann Institute, Beutenbergstr. 11, D-07745 Jena, Germany.

<sup>2</sup>Pharmaceutical Biochemistry and Bioanalytics, Pharmaceutical Institute, University of Bonn, An der Immenburg 4, D-53121 Bonn, Germany.

<sup>3</sup>Friedrich Schiller University, Faculty of Chemistry and Earth Sciences, Humboldtstr. 10, D-07743 Jena, Germany.

\*Correspondence and requests for materials should be addressed to O.O. (email: oliver.ohlenschlaeger@leibniz-fli.de) or D.I. (email: dimhof@uni-bonn.de)

**Supporting information contains 6 Figures (S1-S6), and 1 Table (S1).**

**Figure S1.** Superposition of the [ $^1\text{H}$ , $^{15}\text{N}$ ]-projection from the 3D HNN experiment of the  $_{\text{GB1}}\text{CBS}(1-40)$  fusion protein (red) with the HNCA spectrum (blue). Cross peaks arising from the linker between GB1 and CBS(1-40) are annotated.

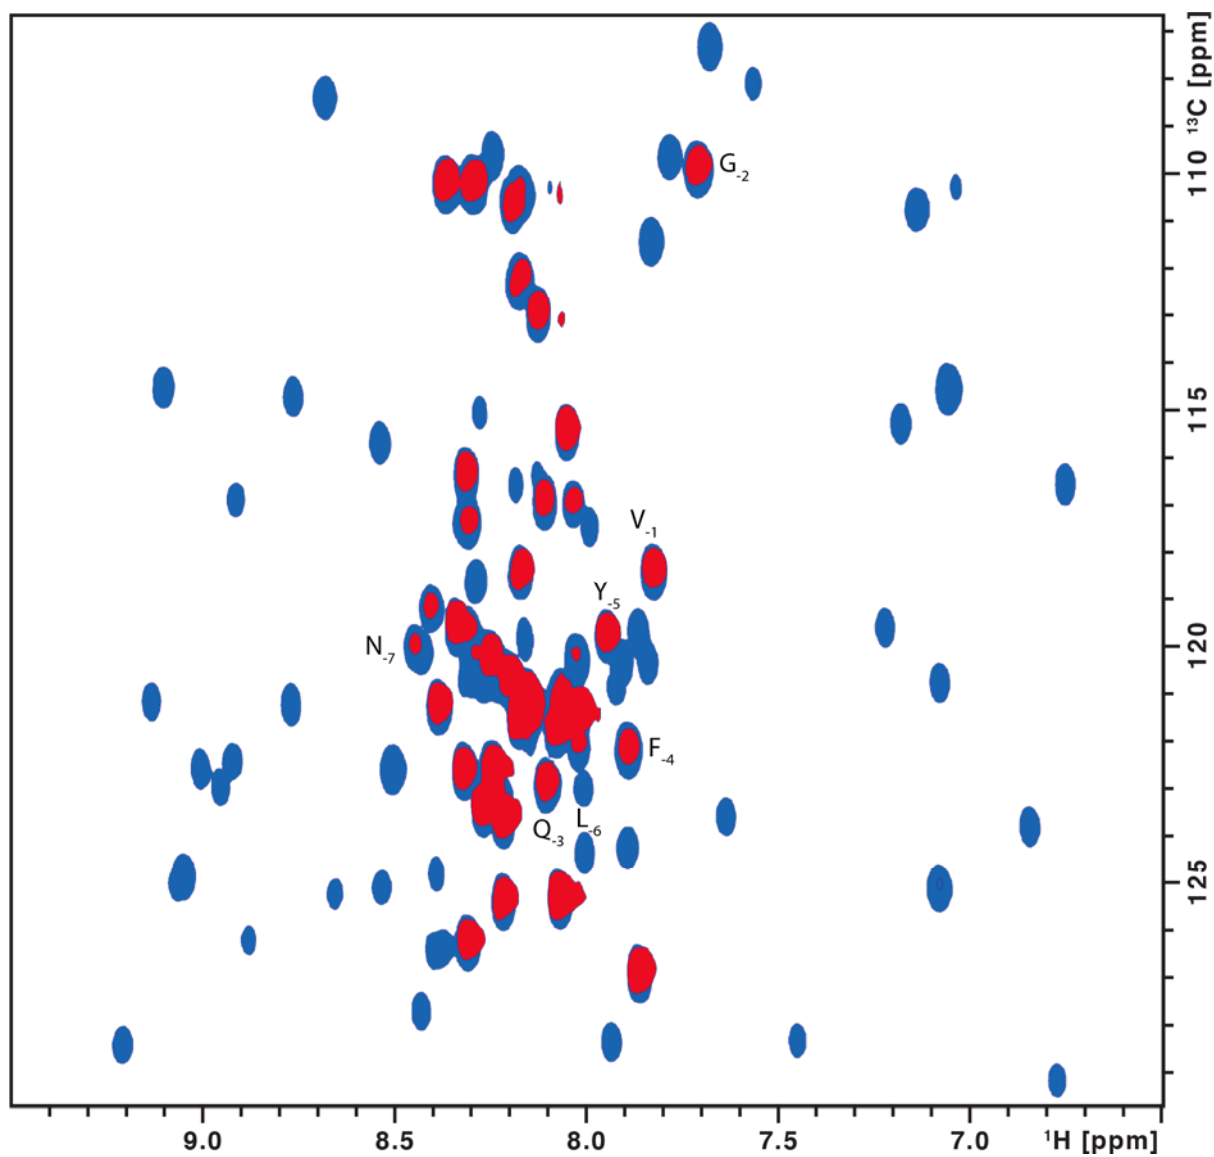

**Figure S2.** Representative strips from the HNN spectrum of  $_{\text{GB1}}\text{CBS}(1-40)$ . The sequential connectivities are indicated by arrows.

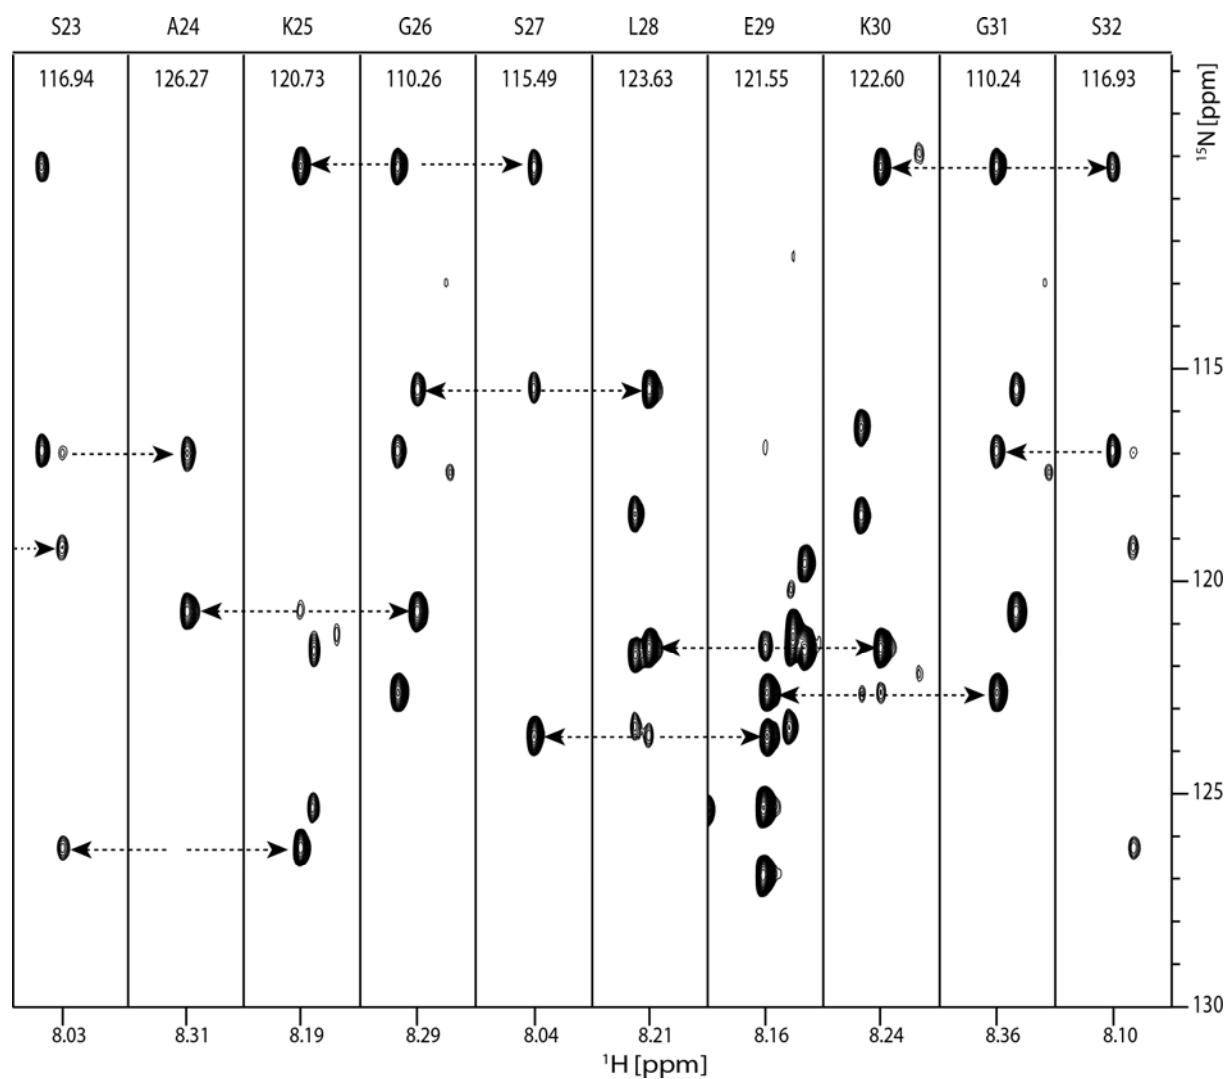

**Figure S3A.** Spectral cross sections from the [ $^1\text{H}$ ,  $^{15}\text{N}$ ]-HSQC spectra of the  $_{\text{GB1}}\text{CBS}(1-40)$  fusion protein (100  $\mu\text{M}$ ) without and with hemin taken at  $^{15}\text{N}$  chemical shift positions corresponding to the amino acid residues indicated (blue – no hemin; red – Ga-PPIX, green – Fe-PPIX). The hemin and Ga-PPIX concentrations used are indicated at the bottom of the panels.

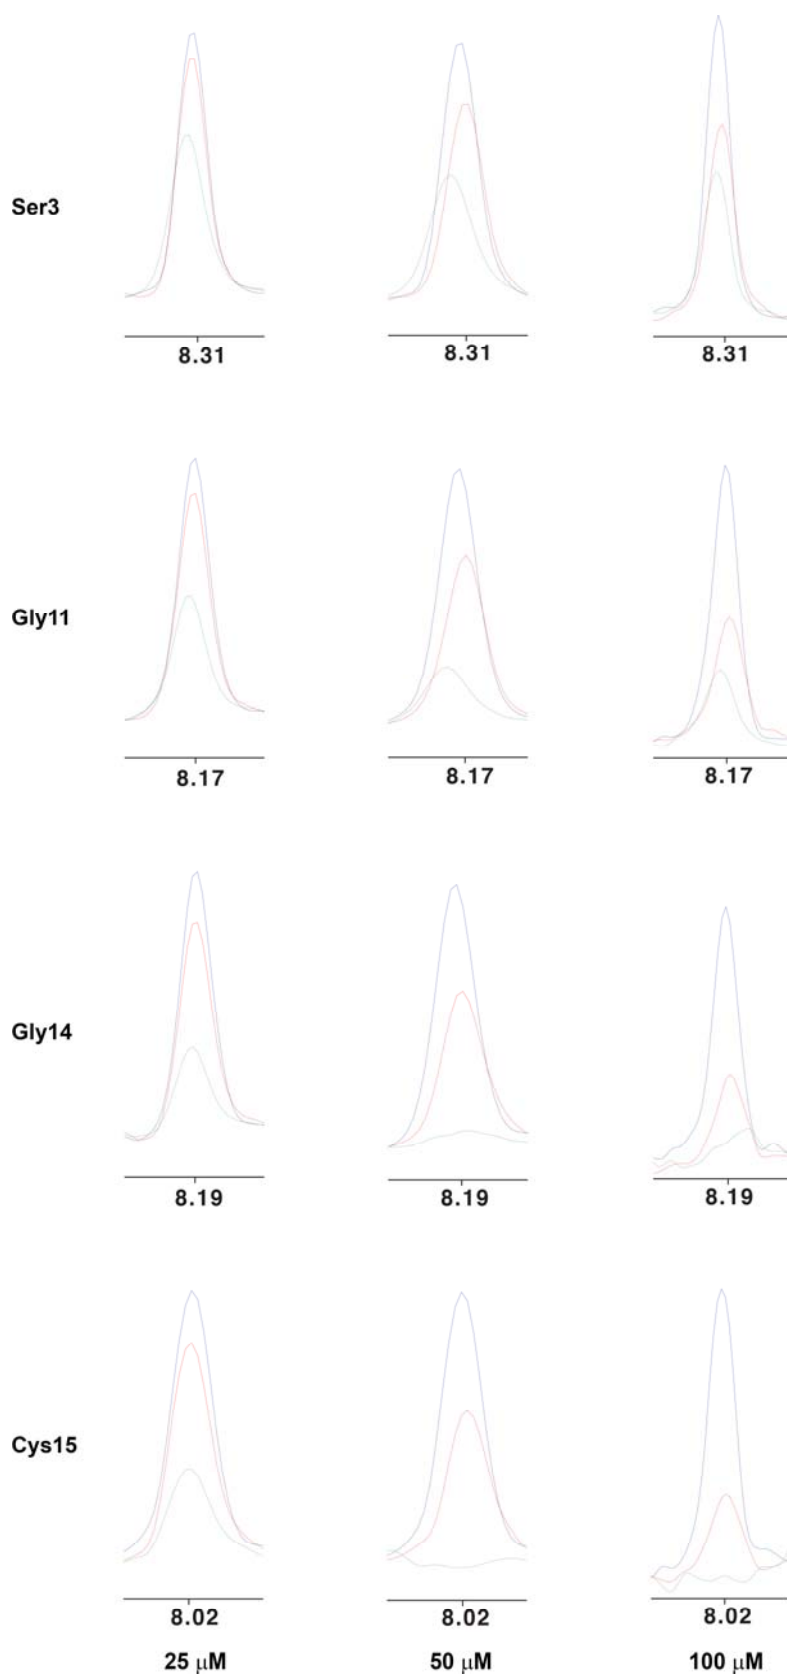

**Figure S3B.** Spectral cross sections from the [ $^1\text{H}$ ,  $^{15}\text{N}$ ]-HSQC spectra of the  $_{\text{GB1}}\text{CBS}(1-40)$  fusion protein (100  $\mu\text{M}$ ) without and with hemin taken at  $^{15}\text{N}$  chemical shift positions corresponding to the amino acid residues indicated (blue – no hemin; red – Ga-PPIX, green – Fe-PPIX). The hemin and Ga-PPIX concentrations used are indicated at the bottom of the panels.

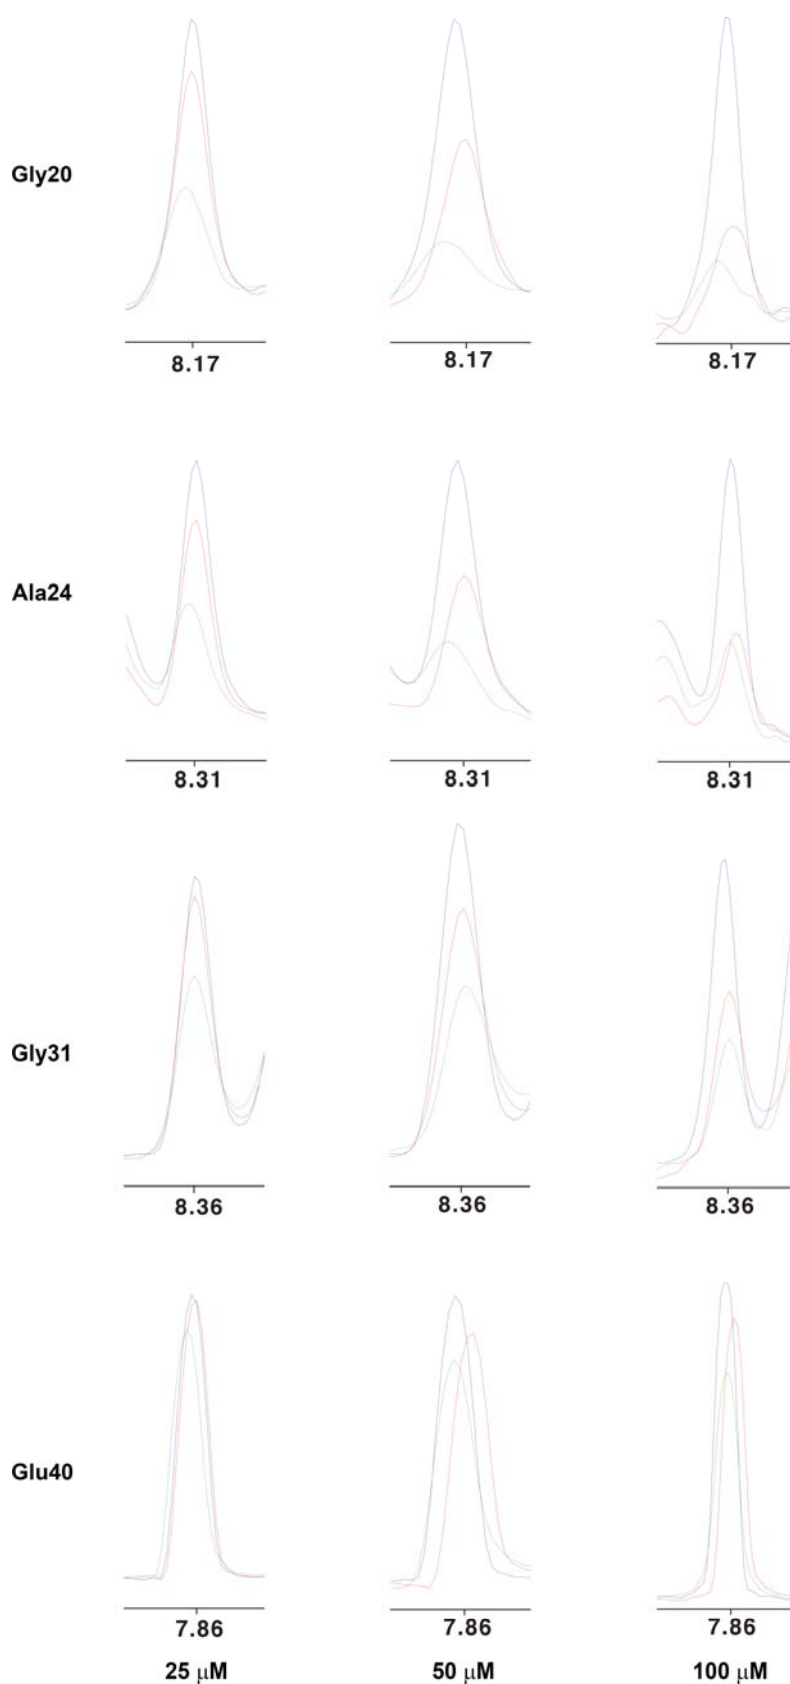

**Figure S4.** Constant-time  $[^1\text{H}, ^{13}\text{C}]$ -HSQC spectrum (zoomed plot) of  $_{\text{GB1}}\text{CBS}(1-40)$  without heme.

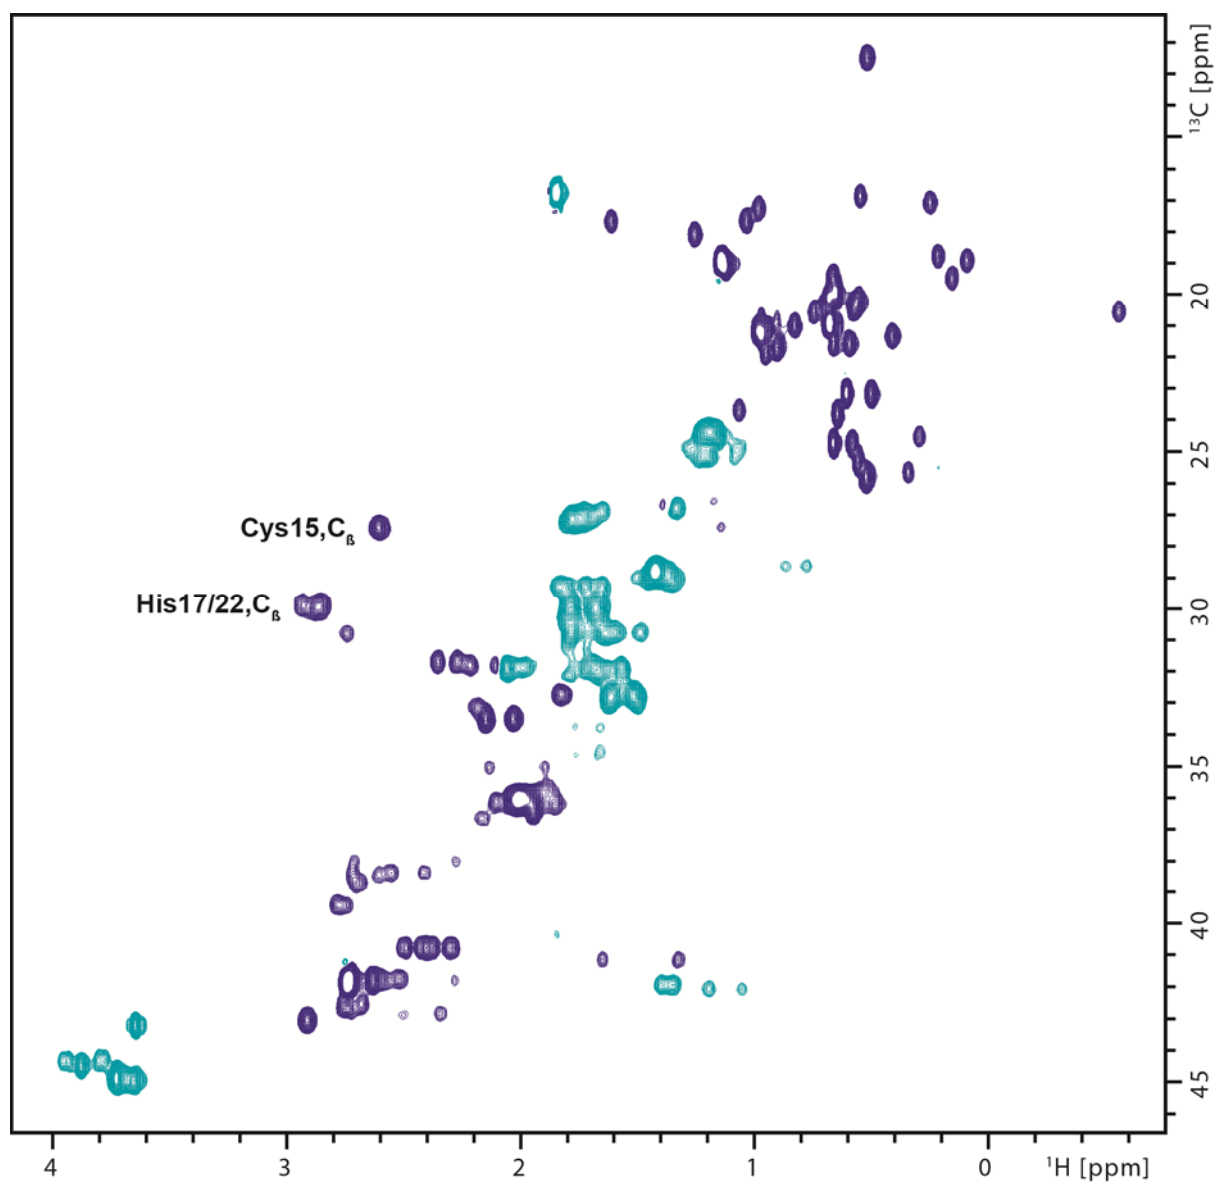

**Figure S5.** UV/Vis spectra for the  $_{GB1}CBS(1-40)C15S$  (A) and  $_{GB1}CBS(1-40)H22L$  (B) mutants. The fusion protein (20  $\mu$ M protein) was incubated with hemin at concentrations of 2 (blue), 10 (red) and 15  $\mu$ M hemin (green).

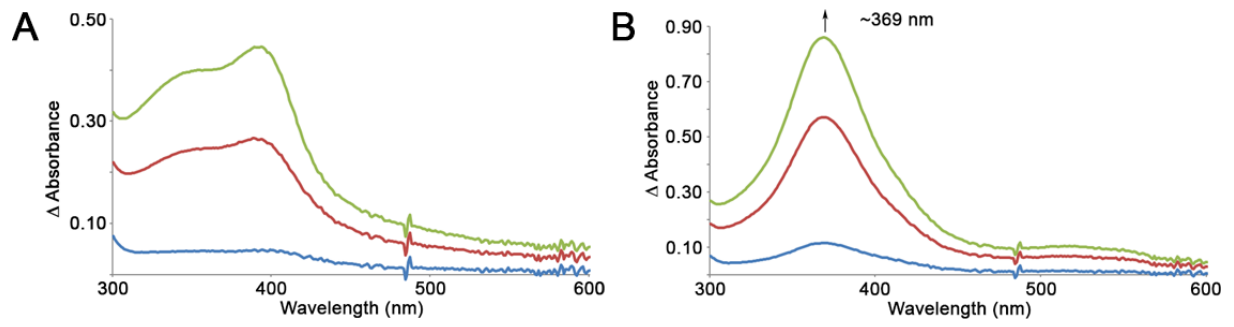

**Figure S6.** 2D Chemical shift correlation spectra (Figure S6A and S6B) generated via a 3D HCN experiment indicating the ( $^{13}\text{C}^{\delta}, ^1\text{H}^{\delta}$ ) and ( $^{13}\text{C}^{\epsilon}, ^1\text{H}^{\epsilon}$ ) cross-peaks of His17 and His22 of CBS40.  $^1\text{H}$  cross-sections taken at the  $^{13}\text{C}^{\delta}$  and  $^{13}\text{C}^{\epsilon}$  positions (cf. Fig. S6B 1-4) in the aromatic [ $^1\text{H}, ^{13}\text{C}$ ]-HSQC spectra generated without (blue) and with (red) the addition of hemin ( $\text{Fe}^{3+}$ ) are given in S6C. Cross peaks 1 and 4 in Fig. S6B/C arise from the thrombin site at the N-terminus of GB1 and serve as indicator for the general solvent PRE effect in Fig. S6C.

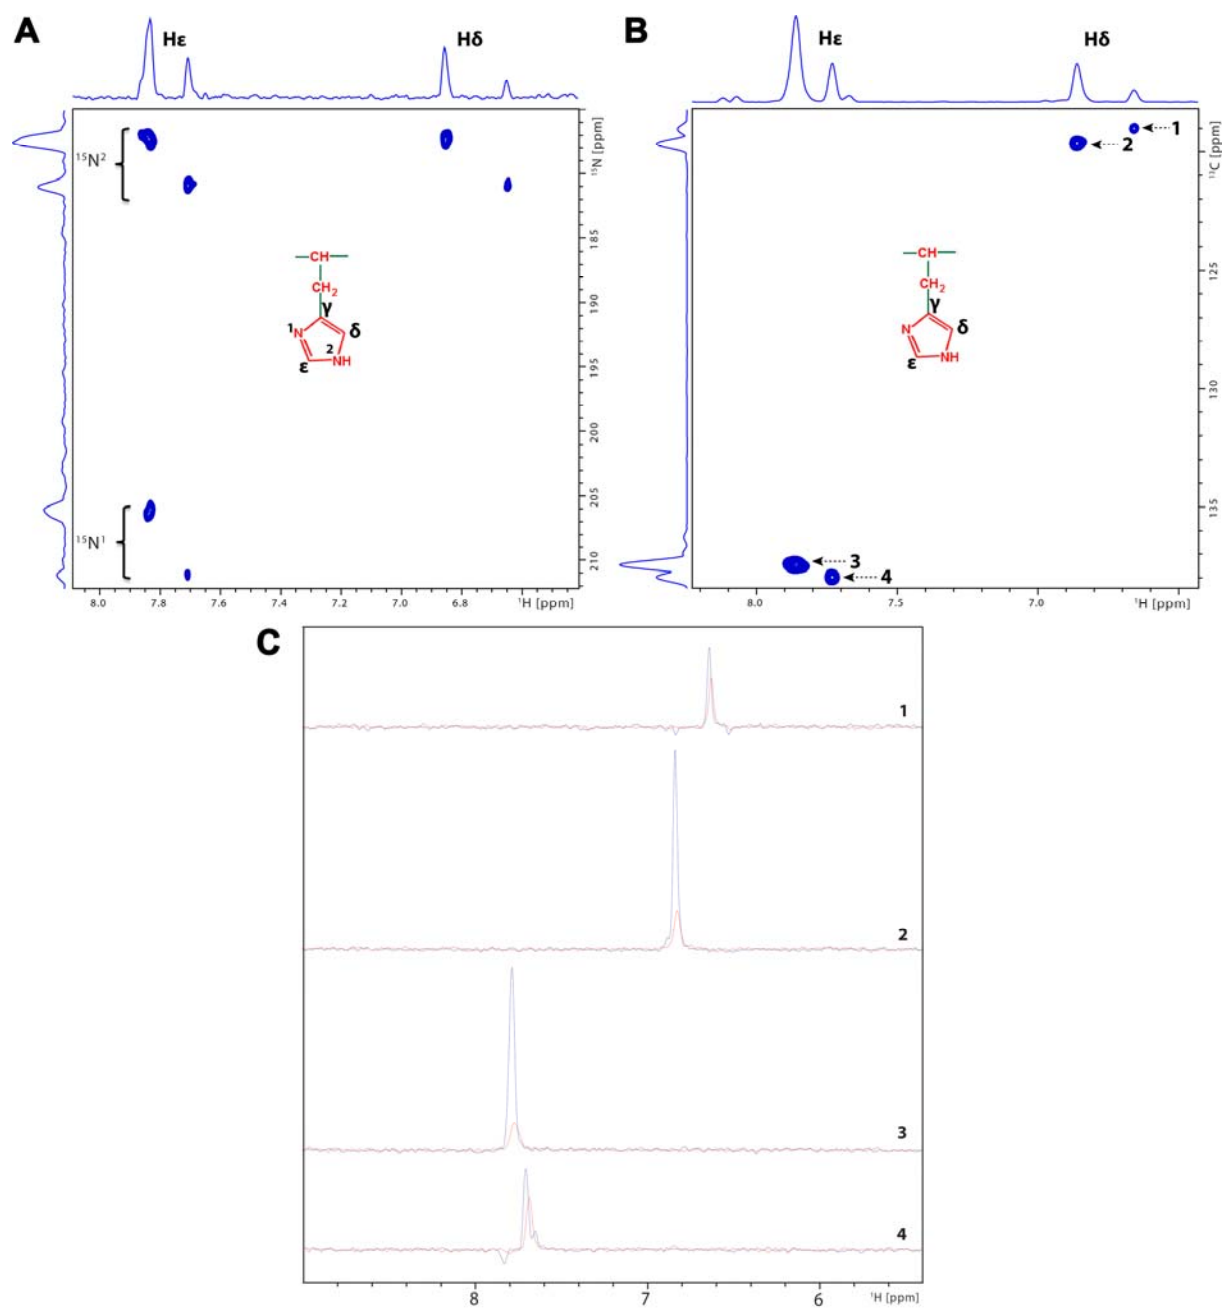



**Table S1. Chemical shift assignment of  $_{GB1}CBS(1-40)$**

|    |     | H'   | N'     | H <sup>α</sup> | H <sup>β</sup> | C'     | C <sup>α</sup> | C <sup>β</sup> | C <sup>γ</sup> | C <sup>δ</sup> | C <sup>ε</sup> |
|----|-----|------|--------|----------------|----------------|--------|----------------|----------------|----------------|----------------|----------------|
| -8 | Glu | 8.50 | 122.60 | 3.97           | 1.70           | 175.43 | 56.42          | 30.28          | 36.05          | -              | -              |
| -7 | Asn | 8.44 | 120.05 | 4.37           | 2.40,2.55      | 174.72 | 52.86          | 38.26          | -              | -              | -              |
| -6 | Leu | 8.01 | 122.10 | 3.94           | 1.05,1.20      | 176.79 | 55.32          | 41.86          | 26.50          | 24.53,23.40    | -              |
| -5 | Tyr | 7.94 | 119.77 | 4.27           | 2.60,2.71      | 175.16 | 57.48          | 38.41          | -              | -              | -              |
| -4 | Phe | 7.88 | 122.19 | 4.26           | 2.79,2.75      | 174.99 | 57.73          | 39.38          | -              | -              | -              |
| -3 | Gln | 8.10 | 122.95 | 3.99           | 1.80,1.64      | 175.65 | 55.74          | 29.23          | -              | -              | -              |
| -2 | Gly | 7.71 | 109.91 | 3.65           | -              | 173.62 | 44.99          | -              | -              | -              | -              |
| -1 | Val | 7.82 | 118.42 | 3.90           | 1.83           | 175.52 | 61.68          | 32.62          | 20.81,19.86    | -              | -              |
| 0  | Asp | 8.26 | 123.42 | 4.33           | 2.41,2.30      | 175.45 | 54.17          | 40.77          | -              | -              | -              |
| 1  | Met | 8.07 | 121.70 | 4.53           | 1.64           | -      | 52.80          | 32.73          | -              | -              | -              |
| 2  | Pro | -    | -      | 3.39           | 1.66,2.06      | 176.74 | 64.89          | 31.82          | 27.20          | 50.43          | -              |
| 3  | Ser | 8.31 | 116.39 | 4.16           | 3.61           | 174.40 | 58.07          | 63.58          | -              | -              | -              |
| 4  | Glu | 8.31 | 122.63 | 4.12           | 1.67,1.80      | 176.12 | 56.09          | 30.06          | 36.04          | -              | -              |
| 5  | Thr | 8.17 | 118.44 | 4.31           | 3.85           | -      | 59.79          | 69.45          | -              | -              | -              |
| 6  | Pro | -    | -      | 4.16           | 1.62,2.05      | 176.71 | 63.19          | 31.92          | 27.22          | 50.91          | -              |
| 7  | Gln | 8.38 | 121.25 | 3.99           | 1.83,1.70      | 175.61 | 55.66          | 29.22          | 33.75          | -              | -              |
| 8  | Ala | 8.21 | 125.41 | 4.03           | 1.12           | 177.44 | 52.31          | 19.04          | -              | -              | -              |
| 9  | Glu | 8.24 | 120.22 | 4.05           | 1.78,1.67      | 176.22 | 56.03          | 30.07          | 35.97          | -              | -              |
| 10 | Val | 8.06 | 121.07 | 3.91           | 1.81           | 176.13 | 61.78          | 32.63          | 19.75,20.71    | -              | -              |
| 11 | Gly | 8.17 | 112.27 | 3.79           | -              | -      | 44.38          | -              | -              | -              | -              |
| 12 | Pro | -    | -      | 4.24           | 1.72,2.05      | 177.50 | 63.25          | 31.85          | 26.96          | 49.62          | -              |
| 13 | Thr | 8.12 | 113.00 | 4.11           | 4.01           | 175.10 | 61.71          | 69.35          | 21.24          | -              | -              |
| 14 | Gly | 8.19 | 110.69 | 3.70           | -              | 173.43 | 44.93          | -              | -              | -              | -              |
| 15 | Cys | 8.02 | 120.25 | 4.53           | 2.61           | -      | 56.12          | 27.32          | -              | -              | -              |
| 16 | Pro | -    | -      | 4.15           | 1.57,1.99      | 176.40 | 63.11          | 31.81          | 27.03          | 50.58          | -              |
| 17 | His | 8.30 | 119.68 | 4.37           | 2.87           | 174.90 | 55.91          | 30.05          | -              | -              | -              |
| 18 | Arg | 8.23 | 123.16 | 4.12           | 1.49           | 175.81 | 55.92          | 30.78          | 26.79          | 43.12          | -              |
| 19 | Ser | 8.30 | 117.39 | 4.26           | 3.62           | 174.27 | 58.01          | 63.78          | -              | -              | -              |
| 20 | Gly | 8.17 | 110.42 | 3.88           | -              | -      | 44.60          | -              | -              | -              | -              |
| 21 | Pro | -    | -      | 4.15           | 1.56,1.97      | 176.92 | 63.35          | 31.70          | 26.81          | 49.48          | -              |
| 22 | His | 8.40 | 119.19 | 4.42           | 2.94,2.87      | 174.98 | 56.01          | 29.94          | -              | -              | -              |
| 23 | Ser | 8.03 | 116.98 | 4.14           | 3.56           | 174.01 | 58.07          | 63.62          | -              | -              | -              |
| 24 | Ala | 8.31 | 126.25 | 4.09           | 1.14           | 177.68 | 52.37          | 18.94          | -              | -              | -              |
| 25 | Lys | 8.19 | 120.71 | 4.03           | 1.53,1.60      | 177.11 | 56.31          | 32.64          | 24.44          | 28.84          | 41.78          |
| 26 | Gly | 8.29 | 110.26 | 3.72           | -              | 173.99 | 44.98          | -              | -              | -              | -              |
| 27 | Ser | 8.04 | 115.48 | 4.17           | 3.61           | 174.59 | 58.16          | 63.52          | -              | -              | -              |
| 28 | Leu | 8.21 | 123.64 | 4.11           | 1.40,1.36      | 177.26 | 55.02          | 41.85          | 26.62          | 24.47,23.36    | -              |
| 29 | Glu | 8.16 | 121.55 | 3.99           | 1.64,1.77      | 176.34 | 56.20          | 29.89          | 35.88          | -              | -              |
| 30 | Lys | 8.24 | 122.62 | 4.04           | 1.52,1.62      | 176.96 | 56.12          | 32.72          | 24.42          | 28.73          | 41.87          |
| 31 | Gly | 8.36 | 110.24 | 3.73           | -              | 173.54 | 44.86          | -              | -              | -              | -              |
| 32 | Ser | 8.10 | 116.93 | 4.55           | 3.64           | -      | 56.14          | 63.19          | -              | -              | -              |
| 33 | Pro | -    | -      | 4.16           | 2.06           | 177.06 | 63.30          | 31.71          | 27.19          | 50.34          | -              |
| 34 | Glu | 8.33 | 119.57 | 3.95           | 1.78,1.67      | 176.23 | 56.63          | 29.87          | 36.25          | -              | -              |
| 35 | Asp | 8.01 | 121.38 | 4.32           | 2.38,2.50      | 176.16 | 54.23          | 40.78          | -              | -              | -              |
| 36 | Lys | 8.06 | 121.63 | 4.03           | 1.63,1.51      | 176.52 | 56.15          | 32.60          | 24.34          | 28.71          | 41.73          |
| 37 | Glu | 8.15 | 121.07 | 3.98           | 1.78,1.68      | 176.00 | 56.12          | 29.84          | 36.07          | -              | -              |
| 38 | Ala | 8.06 | 125.34 | 4.04           | 1.13           | 177.29 | 52.24          | 18.85          | -              | -              | -              |
| 39 | Lys | 8.17 | 121.55 | 4.09           | 1.62,1.50      | 175.51 | 55.85          | 33.00          | 24.43          | 28.78          | 42.07          |
| 40 | Glu | 7.86 | 126.91 | 3.85           | 1.78,1.64      | -      | 57.75          | 30.71          | -              | -              | -              |
